# Supplementary material for: Green Synthesis and Characterization of Novel Silver Nanoparticles Using Achillea maritima subsp. maritima Aqueous Extract: Antioxidant and Antidiabetic Potential and Effect on Virulence Mechanisms of Bacterial and Fungal Pathogens
Source: MDPI journal article supplement (doi:10.3390/nano13131964), 2023-06-28
Supplement: s1 [file s1]

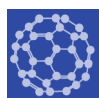

# Green synthesis and characterization of novel silver nanoparticles using *Achillea maritima* subsp. *maritima* aqueous extract: antioxidant, antidiabetic potentialities and effect on virulence mechanisms of bacterial and fungal pathogens

Badiaa Essghaier<sup>1,\*</sup>, Hédia Hannachi<sup>2</sup>, Rihem Nouir<sup>3,4</sup>, Filomena Mottola<sup>5</sup> and Lucia Rocco<sup>5\*</sup>

- 1 Biochemistry and Biotechnology laboratory LR01 ES05, Department of Biology, Faculty of Sciences of Tunis, University Tunis ELmanar 2092; badiaa.essghaier@fst.utm.tn.;
- 2 Laboratory of Vegetable Productivity and Environmental Constraint LR18ES04, Department of Biology, Faculty of Sciences, University Tunis El-Manar II, 2092, Tunis, Tunisia; hedia.hannachi@fst.utm.tn.
- 3 Laboratoire de Spectroscopie Atomique, Moléculaire et Applications (LSAMA), Faculty of Sciences, Tunis El Manar University, 2092 Tunis, Tunisia,
- 4 Higher Institute of Medical Technologies of Tunis, Tunis El Manar University, 2092, Tunis, Tunisia, (R.M) rihem.nouir@gmail.com.
- 5 Department of Environmental, Biological and Pharmaceutical Sciences and Technologies (DiSTABiF) University of Campania "L. Vanvitelli", 81100 Caserta – Italy; filomena.mottola@unicampania.it (F.M.), lucia.rocco@unicampania.it (L.R).

\* Correspondence: badiaa.essghaier@fst.utm.tn. (BE); lucia.rocco@unicampania.it (LR)

**Figure S1** Antibacterial results by agar diffusion method

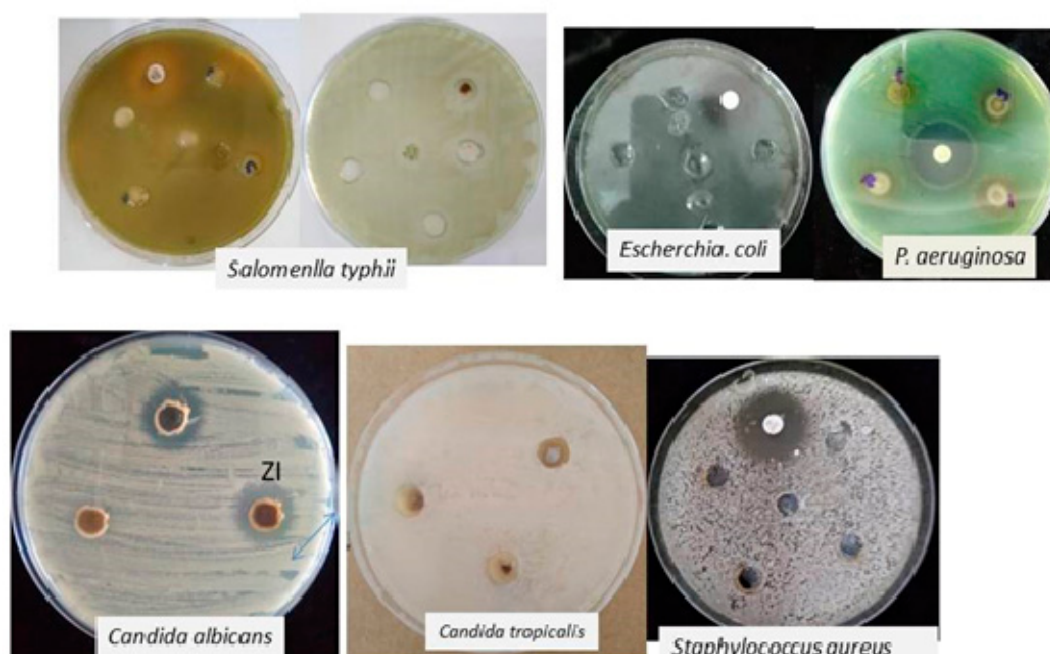

Figure S1: Antimicrobial agar well diffusion results. AgNPs (40µL) t: or st: negative control (water distilled)
